# Supplementary material for: Factors Associated With Intention to Adopt mHealth Apps Among Dementia Caregivers With a Chronic Condition: Cross-sectional, Correlational Study
Source: PubMed Central journal article supplement (PMC8441609; doi:10.2196/27926), 2021-08-31
Supplement: mhealth_v9i8e27926_app2.pdf [file mhealth_v9i8e27926_app2.pdf]

Multimedia Appendix 2

Table S1. Summary of descriptive statistics for independent and dependent variables.

| Study Variables                         | Median (Range) | Mean (SD)   |
|-----------------------------------------|----------------|-------------|
| <b>Dependent variable</b>               |                |             |
| Intention to adopt mHealth applications | 8 (0- 12)      | 7.7 (3.7)   |
| <b>Independent variables</b>            |                |             |
| Perceived usefulness                    | 19 (0- 24)     | 16.8 (6.8)  |
| Perceived ease of use                   | 23 (1- 30)     | 21.7 (7)    |
| Social influence                        | 12 (2- 18)     | 11.9 (4.2)  |
| Caregiver burden                        | 21 (0- 43)     | 21.3 (10.2) |
| Hours caregiving per week               | 18 (0.43- 212) | 27.3 (30.8) |
| Burden of chronic disease/treatment     | 29 (0- 78)     | 29.7 (20.7) |

Table S2. Crosstabulation of education and burden of chronic disease/treatment interaction term and outcome, intention to adopt mHealth applications (apps).

|                  |          | <b>Intention to adopt mHealth apps</b> |          |              |
|------------------|----------|----------------------------------------|----------|--------------|
|                  |          | 0 (Low)                                | 1 (High) | <b>Total</b> |
| <b>IIRS *</b>    | 0 (Low)  | 63                                     | 26       | 89           |
| <b>Education</b> | 1 (High) | 11                                     | 17       | 28           |
| <b>Total</b>     |          | 74                                     | 43       | 117          |

Table S3. Group comparisons of burden of chronic disease/treatment (IIRS) and intention to adopt mHealth applications (apps) by education level.

|                          |                                     | <b>Intention to adopt mHealth apps</b> |          |              |        |
|--------------------------|-------------------------------------|----------------------------------------|----------|--------------|--------|
|                          |                                     | 0 (Low)                                | 1 (High) | <b>Total</b> |        |
| <b>Low IIRS (0-29)</b>   | <b>Low education (0-15)</b>         | Count                                  | 10       | 7            | 17     |
|                          |                                     | % within Education                     | 58.8%    | 41.2%        | 100.0% |
|                          | <b>High education (16 &amp; up)</b> | Count                                  | 32       | 10           | 42     |
|                          |                                     | % within Education                     | 76.2%    | 23.8%        | 100.0% |
|                          | <b>Total</b>                        | Count                                  | 42       | 17           | 59     |
|                          |                                     | % within Education                     | 71.2%    | 28.8%        | 100.0% |
| <b>High IIRS (30-78)</b> | <b>Low education (0-15)</b>         | Count                                  | 21       | 9            | 30     |
|                          |                                     | % within Education                     | 70.0%    | 30.0%        | 100.0% |
|                          | <b>High education (16 &amp; up)</b> | Count                                  | 11       | 17           | 28     |
|                          |                                     | % within Education                     | 39.3%    | 60.7%        | 100.0% |

|              |                       |                    |       |       |        |
|--------------|-----------------------|--------------------|-------|-------|--------|
|              | <b>Total</b>          | Count              | 32    | 26    | 58     |
|              |                       | % within Education | 55.2% | 44.8% | 100.0% |
| <b>Total</b> | <b>Low education</b>  | Count              | 31    | 16    | 47     |
|              | <b>(0-15)</b>         | % within Education | 66.0% | 34.0% | 100.0% |
|              | <b>High education</b> | Count              | 43    | 27    | 70     |
|              | <b>(16 &amp; up)</b>  | % within Education | 61.4% | 38.6% | 100.0% |
|              | <b>Total</b>          | Count              | 74    | 43    | 117    |
|              |                       | % within Education | 63.2% | 36.8% | 100.0% |
